# Supplementary material for: Rationally engineered surface properties of carbon nanofibers for the enhanced supercapacitive performance of binary metal oxide nanosheets
Source: Royal Society of Chemistry journal article supplement (doi:10.1039/c5ta05258k), 2015-01-01
Supplement: c5ta05258k1.pdf [file c5ta05258k1.pdf]

Electronic Supplementary Information of

**Rationally Engineered Surface Properties of Carbon Nanofibers on the  
Enhanced Supercapacitive Performance of Binary Metal Oxide**

Ji Hoon Kim<sup>a</sup>, Chang Hyo Kim<sup>a</sup>, Hyeonseok Yoon<sup>a,b</sup>, Je Sung Youm<sup>b</sup>, Yong Chae Jung<sup>c</sup>, Christopher E. Bunker<sup>d</sup>, Yoong Ahm Kim<sup>a, b,\*</sup>, Kap Seung Yang<sup>a, b2,\*\*</sup>

<sup>1</sup>*Department of Polymer Engineering, Graduate School, Chonnam National University, 77 Yongbong-ro, Buk-gu, Gwangju 500-757, Republic of Korea*

<sup>2</sup>*Alan G. MacDiarmid Energy Research Institute and School of Polymer Science and Engineering, Chonnam National University, 77 Yongbong-ro, Buk-gu, Gwangju 500-757, Republic of Korea*

<sup>3</sup>*Institute of Advanced Composite Materials, Korea Institute of Science and Technology (KIST), Chudon-ro 92, Bongdong-eup, Wanju-gun, Jeonbuk 565-905, Republic of Korea*

<sup>4</sup>*Air Force Research Laboratory, Propulsion Directorate, Wright-Patterson Air Force Base, Ohio 45433-7103, USA*

(\*[yak@jnu.ac.kr](mailto:yak@jnu.ac.kr); \*\*[ksyang@jnu.ac.kr](mailto:ksyang@jnu.ac.kr))

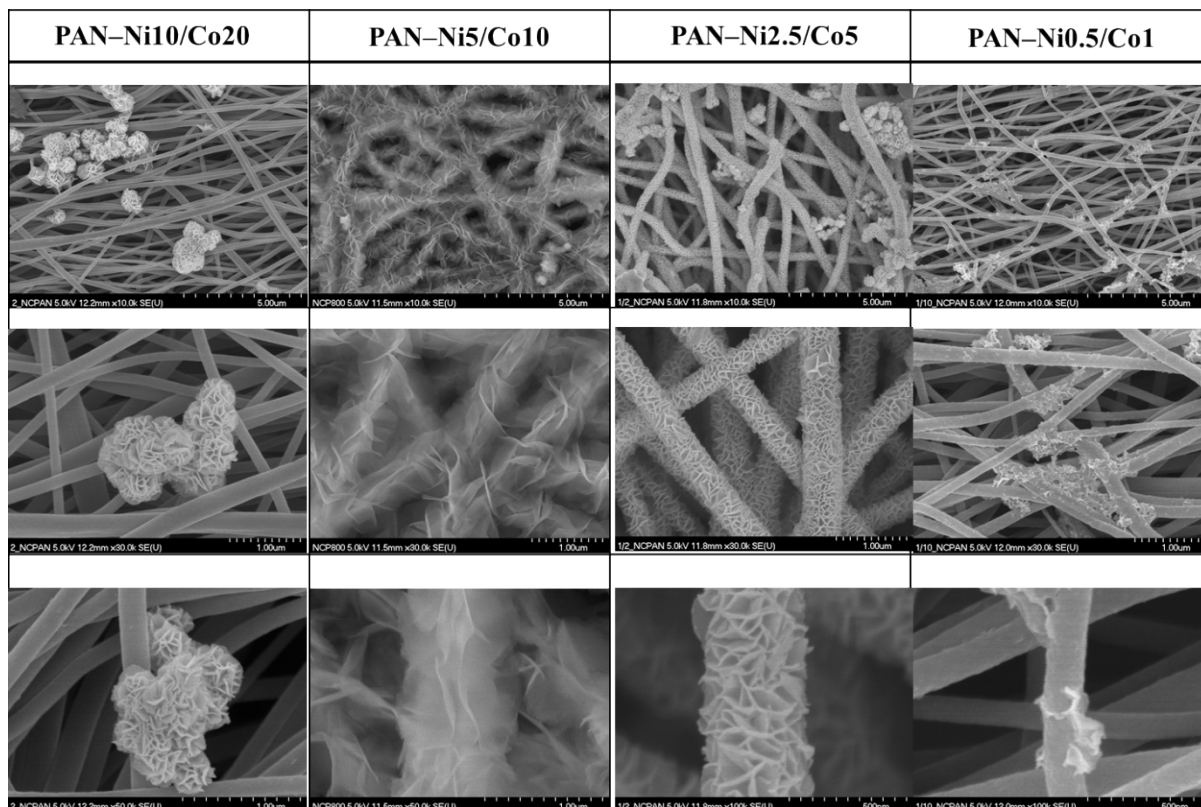

**Figure S1** FE-SEM images of binary metal oxides-decorated carbon nanofibers as a function of the added amount of nickel and cobalt reagents.

(a) PAN1000-Ni2.5/Co5

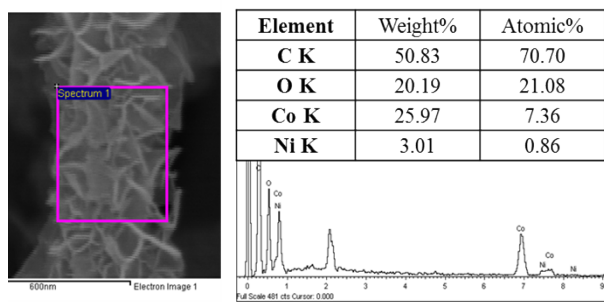

(b) PAN/pitch1000-Ni2.5Co5

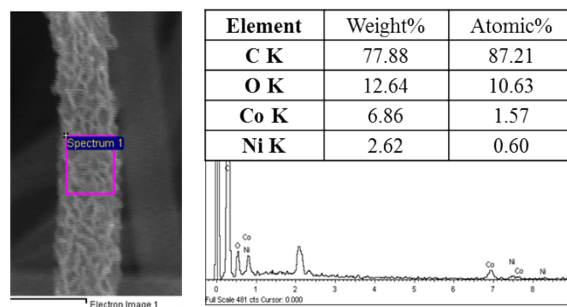

(c) PAN1000-Ni5/Co10

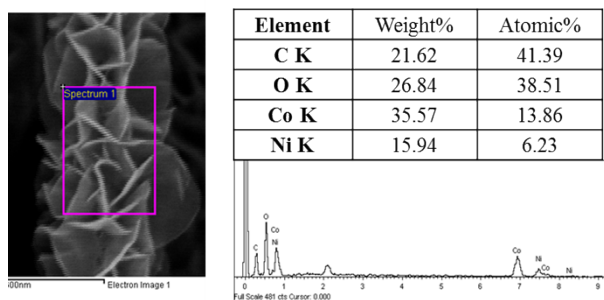

(d) PAN/pitch1000-Ni5/Co10

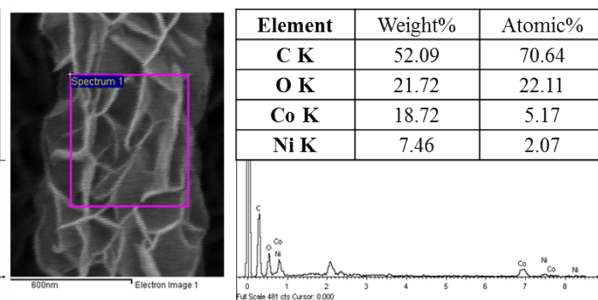

**Figure S2** SEM-EDX analysis results of binary metal oxides-decorated carbon nanofibers at different amount of nickel and cobalt reagents.

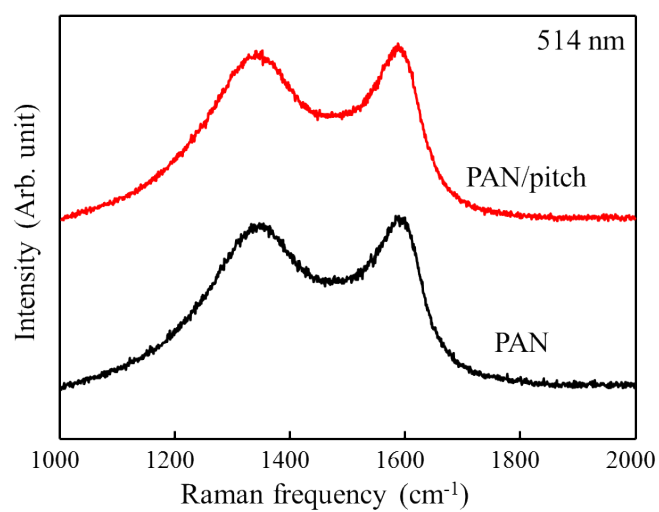

| I.D.      | D band (cm <sup>-1</sup> ) |        | G-band (cm <sup>-1</sup> ) |       | I <sub>D</sub> /I <sub>G</sub> |
|-----------|----------------------------|--------|----------------------------|-------|--------------------------------|
|           | Position                   | HWHM   | Position                   | HWHM  |                                |
| PAN       | 1345.81                    | 110.73 | 1583.16                    | 87.42 | 1.29                           |
| PAN/pitch | 1351.36                    | 105.82 | 1586.71                    | 92.61 | 1.28                           |

**Figure S3** Raman spectra and factors of PAN- and PAN/pitch-derived carbon fibers, respectively.

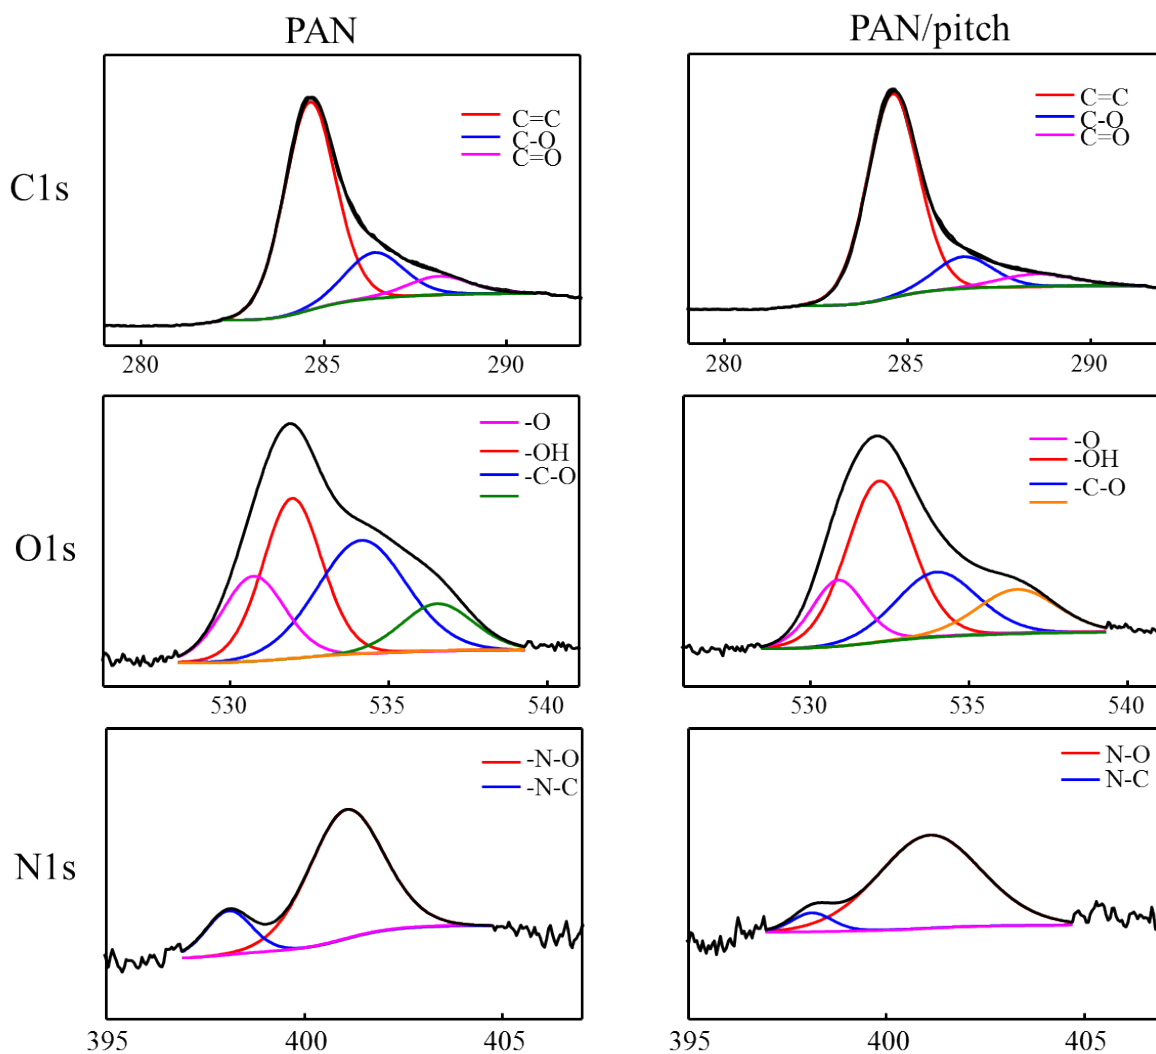

**Figure S4** Detailed C 1s, O 1s and N 1s XPS spectra of PAN- and PAN/pitch-derived carbon nanofibers, respectively.

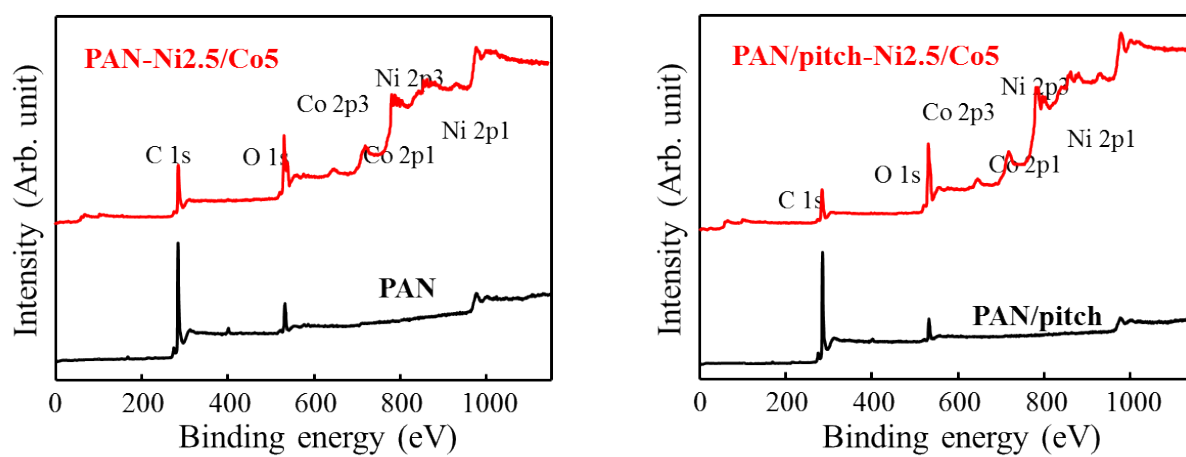

**Figure S5** Wide-scan XPS spectra of pristine carbon nanofibers and metal oxide-decorated carbon nanofibers, respectively.
